# Supplementary material for: Evaluating poverty alleviation strategies in a developing country
Source: PLOS journal article supplement (doi:10.1371/journal.pone.0227176), 2020-01-13
Supplement: S2 (10.1371/journal.pone.0227176.s002) [file journal.pone.0227176.s002]

**S2 Fig. The survey instrument used during the stage 2 of data collection**

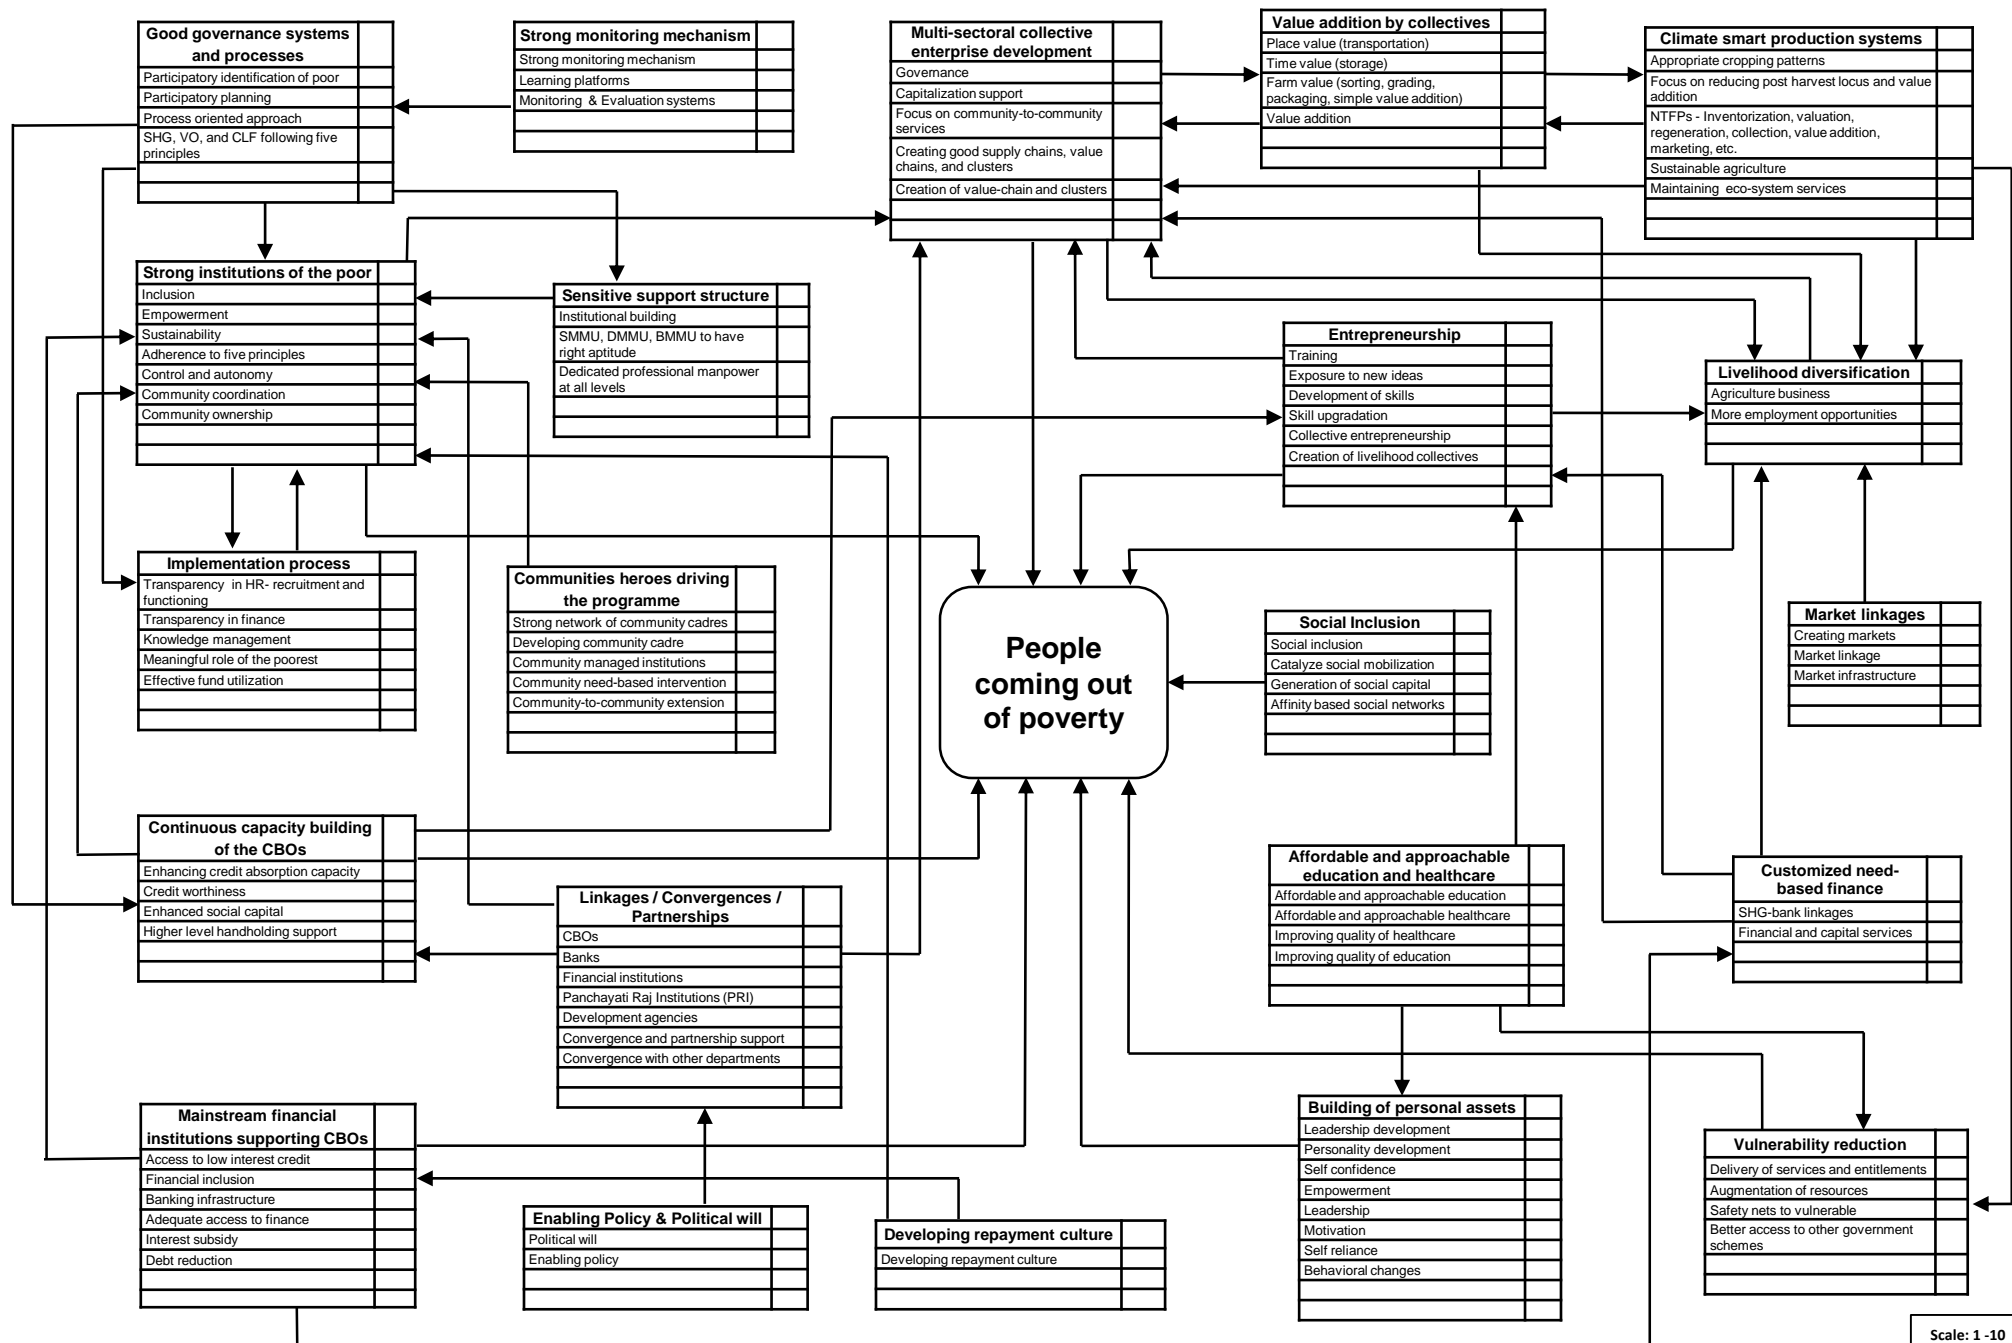

Name of Respondent:

Respondent's Mobile No.:

Gender: Male / Female

State:

District:

Organization's Name:

Designation:

NRLM Experience (Months):
